# Supplementary material for: Risk-reducing salpingo-oophorectomy among diverse patients with BRCA mutations at an urban public hospital: a mixed methods study
Source: HighWire-hosted journal article supplement (doi:10.1136/bmjopen-2023-082608), 2024-06-01
Supplement: bmjopen-2023-082608supp001_data_supplement.pdf [file bmjopen-2023-082608supp001_data_supplement.pdf]

**Supplement 1: ICD-9 and ICD-10 codes for patient recruitment**

| <b>Diagnosis</b>                                          | <b>ICD-10 code</b> | <b>ICD-9 code</b> |
|-----------------------------------------------------------|--------------------|-------------------|
| Genetic susceptibility to malignant neoplasm              | Z15.09             | N/a               |
| Genetic susceptibility to malignant neoplasm of the ovary | Z15.02             | V84.02            |
| Genetic susceptibility to cancer of the breast            | Z15.01             | V84.02            |

**Supplement 2: Survey questions**

| <b>Question</b>                                                                                                                                                                         | <b>Comments about question</b>                                                                                                                                                                                                                                                                                                                                                                                                                       |
|-----------------------------------------------------------------------------------------------------------------------------------------------------------------------------------------|------------------------------------------------------------------------------------------------------------------------------------------------------------------------------------------------------------------------------------------------------------------------------------------------------------------------------------------------------------------------------------------------------------------------------------------------------|
| <b>What is the name of the mutation that you have?</b>                                                                                                                                  | If patients did not know the answer, the interview would be stopped, and they would be asked permission for research team to contact genetic counselors to coordinate further care.                                                                                                                                                                                                                                                                  |
| <b>Can you tell me what you remember from when you were diagnosed with this mutation?</b>                                                                                               | Potential follow-up questions: <ul style="list-style-type: none"> <li>- Who gave you this information?</li> <li>- What did you think about when you were told?</li> <li>- How did you feel?</li> <li>- You mentioned _____. Can you tell me more about that?</li> </ul>                                                                                                                                                                              |
| <b>What do you remember being told about ways to decrease your risk for ovarian cancer?</b>                                                                                             | Potential follow-up questions: <ul style="list-style-type: none"> <li>- Where did you get your information from?</li> <li>- What did you think about these options?</li> <li>- How did you feel about these options?</li> </ul>                                                                                                                                                                                                                      |
| <b>Do you remember being told about surgeries to decrease your chances of ovarian cancer?</b>                                                                                           | If patients did not know the answer, the interview would be stopped, and they would be asked permission for research team to contact genetic counselors to coordinate further care.                                                                                                                                                                                                                                                                  |
| <b>I would like to talk more about your thoughts on having a surgery to remove the ovaries to reduce the risk of ovarian cancer. Which of the following options best describes you?</b> | Options: <ul style="list-style-type: none"> <li>- Already had the surgery</li> <li>- Will not have the surgery</li> <li>- Undecided about the surgery</li> <li>- Plan to have the surgery in the future</li> </ul>                                                                                                                                                                                                                                   |
| <b>Can you walk me through how you made (or are making) the decision about whether or not to have the surgery to remove the ovaries?</b>                                                | Potential follow-up questions: <ul style="list-style-type: none"> <li>- What or who helped you make this decision?</li> <li>- What [has] made it difficult to make a decision?</li> <li>- What concerns did or do you have about surgery to remove the ovaries?</li> <li>- What would have made making this decision easier?</li> <li>- How did your health care team support you in making a decision? What could they have done better?</li> </ul> |

|                                                                                                                                                                       |                                                                                                                                                                                                                                                                                                                                     |
|-----------------------------------------------------------------------------------------------------------------------------------------------------------------------|-------------------------------------------------------------------------------------------------------------------------------------------------------------------------------------------------------------------------------------------------------------------------------------------------------------------------------------|
|                                                                                                                                                                       | <ul style="list-style-type: none"> <li>- What resources helped you make or carry out your decision?</li> <li>- Were you ever concerned about your finances/work/childcare/transportation when making a decision about surgery? What were your concerns?</li> <li>- You mentioned _____. Can you tell me more about that?</li> </ul> |
| <b>If you have not had the surgery, are you being screened for ovarian cancer or seeing a doctor regularly about your ovarian cancer risk?</b>                        | If patients said no, they would be encouraged to follow-up with a healthcare provider and provided with phone numbers for the Gynecology clinics.                                                                                                                                                                                   |
| <b>If you had a friend or loved one who had to make the same decision as you about whether or not to have their ovaries removed, what advice would you give them?</b> |                                                                                                                                                                                                                                                                                                                                     |
| <b>Is there anything else you want to share with me about your experience making decisions about your ovarian cancer risk?</b>                                        |                                                                                                                                                                                                                                                                                                                                     |
